# Supplementary material for: Development of a downstream process for the production of an inactivated whole hepatitis C virus vaccine
Source: PubMed Central journal article supplement (PMC7530675; doi:10.1038/s41598-020-72328-5), 2020-10-01
Supplement: 41598_2020_72328_MOESM1_ESM.pdf [file 41598_2020_72328_MOESM1_ESM.pdf]

1 Development of a downstream process for the production of an  
2 inactivated whole hepatitis C virus vaccine

3 Keven Lothert<sup>1\*</sup>; Anna F. Offersgaard<sup>2\*</sup>; Anne F. Pihl<sup>2</sup>; Christian K. Mathiesen<sup>2</sup>, Tanja B.  
4 Jensen<sup>2</sup>; Garazi Peña Alzua<sup>2</sup>, Ulrik Fahnøe<sup>2</sup>; Jens Bukh<sup>2</sup>; Judith M. Gottwein<sup>2§</sup>; Michael W.  
5 Wolff<sup>1,3§</sup>

6  
7 1. Institute of Bioprocess Engineering and Pharmaceutical Technology, Technische  
8 Hochschule Mittelhessen – University of Applied Sciences, Giessen, Germany

9  
10 2. Copenhagen Hepatitis C Program (CO-HEP), Department of Infectious Diseases, Hvidovre  
11 Hospital and Department of Immunology and Microbiology, Faculty of Health and Medical  
12 Sciences, University of Copenhagen, Copenhagen, Denmark

13  
14 3. Fraunhofer Institute for Molecular Biology and Applied Ecology (IME), Giessen, Germany

15  
16  
17 \*, Authors contributed equally

18 §, Authors contributed equally

19 Corresponding authors: Judith M. Gottwein (jgottwein@sund.ku.dk),  
20 Department of Infectious Diseases,  
21 Copenhagen University Hospital, Hvidovre  
22 Kettegård Alle 30, 2650 Hvidovre, Denmark

23 and

24 Michael W. Wolff (michael.wolff@lse.thm.de)  
25 Department of Life Science Engineering  
26 University of Applied Sciences Mittelhessen  
27 Wiesenstrasse 14, 35390 Giessen, Germany

28

29

30 **Supplementary Results**

| Protein              | Core | E2    | E2    | NS2   | NS2   | NS2   | NS2    | NS4B   | NS4B   | NS5A   | NS5A   |
|----------------------|------|-------|-------|-------|-------|-------|--------|--------|--------|--------|--------|
| Nucleotide position  | 373  | 1571  | 2464  | 2822  | 2824  | 2935  | 3364   | 5812   | 6067   | 6729   | 7296   |
| Original nucleotide  | C    | C     | G     | G     | C     | A     | G      | G      | G      | C      | C      |
| Acquired nucleotide  | A    | G     | A     | A     | T     | C     | A      | A      | C      | A      | T      |
| Allele frequency (%) | 44   | 46    | 22    | 29    | 21    | 26    | 48     | 27     | 75     | 45     | 28     |
| Amino acid change    | T11N | N410K | S708N | M827I | A828V | N865T | R1008Q | G1824D | G1909A | L2130I | P2319S |

| Protein              | ... | NS5A   | NS5A   | NS5A   | NS5A   | NS5A   | NS5B   | NS5B   | NS5B   | NS5B   | NS5B   |
|----------------------|-----|--------|--------|--------|--------|--------|--------|--------|--------|--------|--------|
| Nucleotide position  | ... | 7464   | 7522   | 7588   | 7591   | 7596   | 7785   | 8292   | 8985   | 9045   | 9298   |
| Original nucleotide  | ... | A      | A      | A      | T      | T      | A      | A      | A      | A      | A      |
| Acquired nucleotide  | ... | G      | G      | G      | C      | C      | G      | C      | C      | C      | G      |
| Allele frequency (%) | ... | 23     | 21     | 26     | 49     | 23     | 46     | 83     | 28     | 47     | 98     |
| Amino acid change    | ... | S2375G | E2394G | D2416G | V2417A | C2419R | S2482G | N2651H | I2882L | I2902L | H2986R |

31 **Supplementary Table S1:** Next generation sequencing analysis of the open reading frame of  
 32 the 1a HCV virus production. The sequence of 1a virus produced for DSP development  
 33 (passage 20) was analyzed. Nucleotide and protein positions are stated relative to the TNcc  
 34 sequence (GenBank accession no. JX993348) and are equivalent to positions in the 1a H77  
 35 sequence (GenBank accession no. AF009606). Positions with changes of at least 20%  
 36 population prevalence are included in the table.
